# Supplementary material for: Dnmt3aa but Not Dnmt3ab Is Required for Maintenance of Gametogenesis in Nile Tilapia (Oreochromis niloticus)
Source: MDPI journal article supplement (doi:10.3390/ijms221810170), 2021-09-21
Supplement: s1 [file s1]

## Supplementary Figure S1

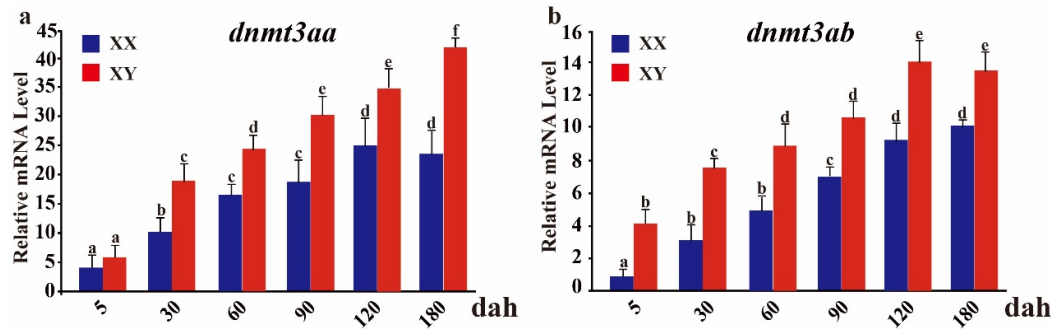

**Supplementary Figure S1.** (a-b) Ontogenetic expression of *dnmt3aa* and *dnmt3ab* by qRT-PCR. Results were presented as mean  $\pm$  SD. *gapdh* was selected as the internal control. Different letters above the error bar indicate statistical differences at  $p < 0.05$ , as determined by one-way ANOVA followed by Tukey's post-hoc test. dah, day after hatching.

## Supplementary Figure S2

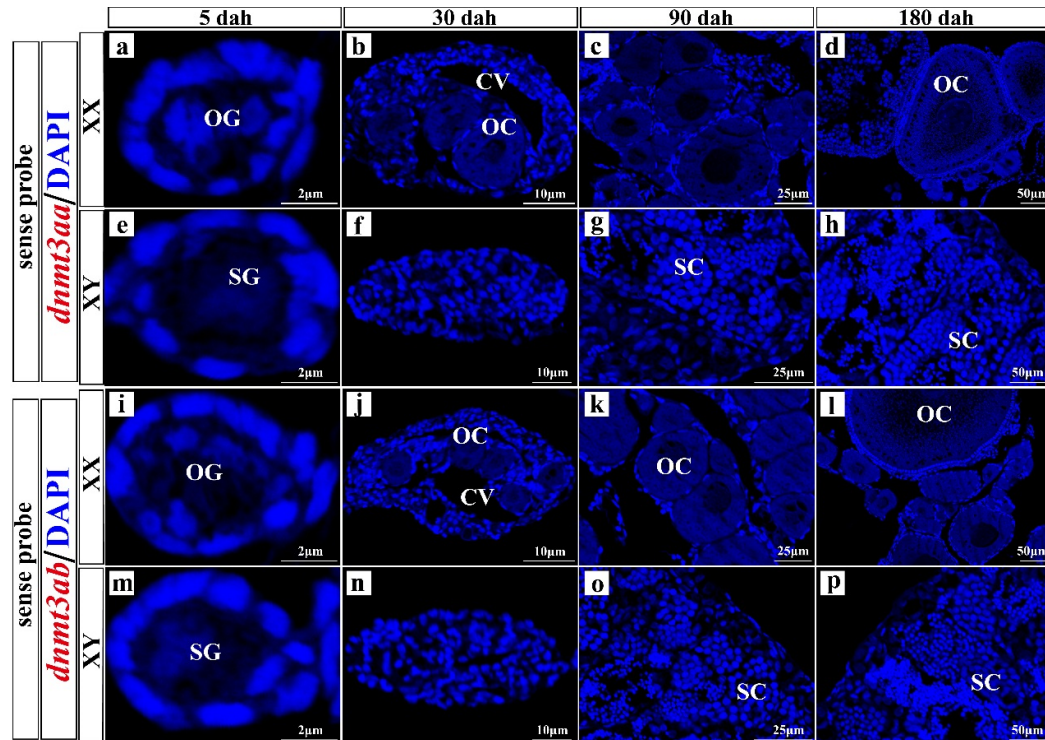

**Supplementary Figure S2.** (a-p) Cellular localization of *dnmt3aa* and *dnmt3ab* in tilapia testes and ovaries at different developmental stages by FISH. No signal for *dnmt3aa* and *dnmt3ab*

were detectable in the ovaries and testes using the sense probe. dah, day after hatching.

### Supplementary Figure S3

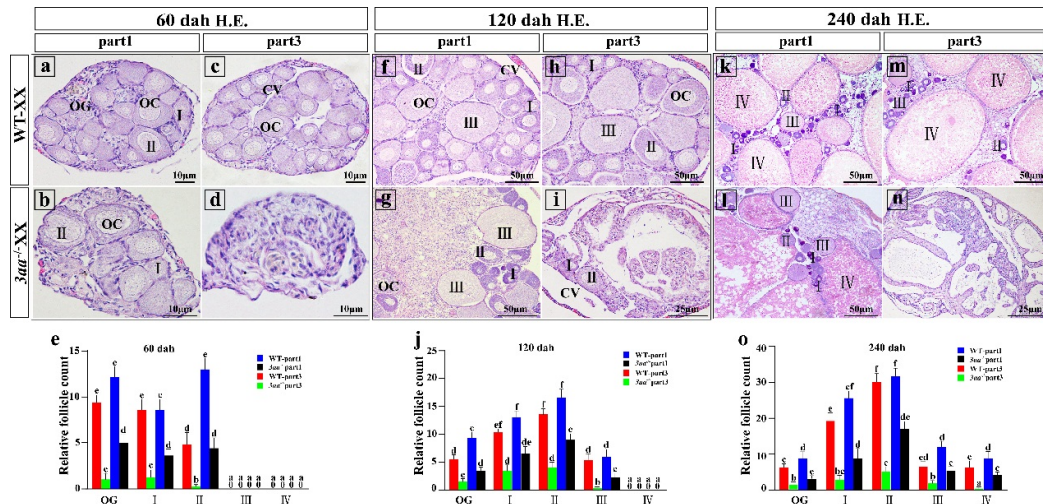

**Supplementary Figure S3.** (a-d, f-i, k-n) Histological observation WT and *dnmt3aa*<sup>-/-</sup> ovaries of part1 and part3 at 60, 120 and 240 dah. (e, j, o) Statistical analysis the number of WT and *dnmt3aa*<sup>-/-</sup> part1 and part3 ovarian follicles at 60, 120 and 240 dah. Results were presented as mean  $\pm$  SD. Different letters above the error bar indicate statistical differences at  $p < 0.05$  as determined by one-way ANOVA followed by Tukey's post-hoc test. dah, day after hatching.

### Supplementary Figure S4

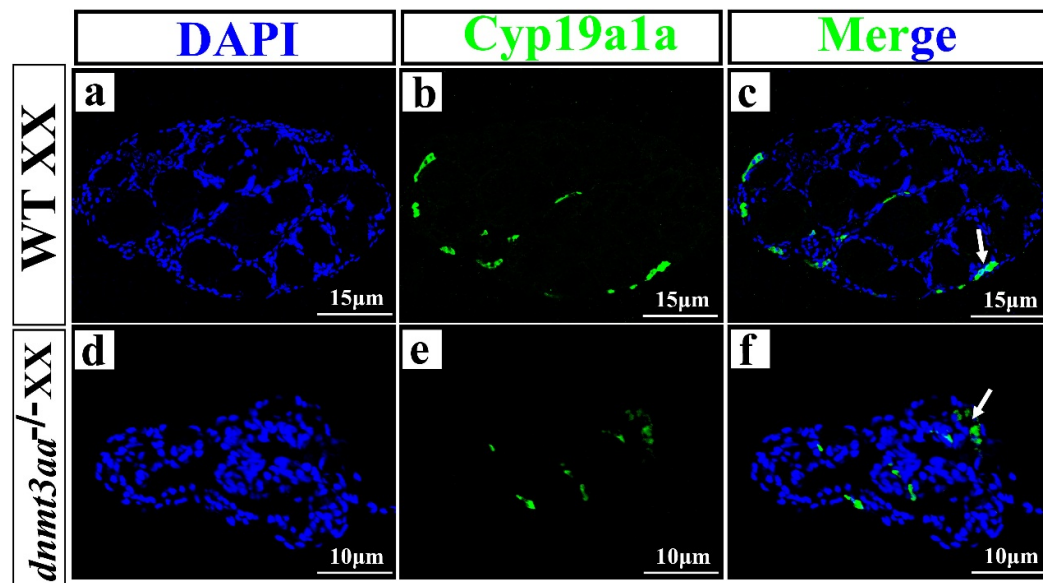

**Supplementary Figure S4.** Expression analysis of *cyp19a1a* (female pathway key gene) in WT (a-c) and *dnmt3aa*<sup>-/-</sup> ovaries (d-f). Green fluorescence represents the Cyp19a1a signals (white arrows). Blue fluorescence represents the DAPI signals.

### Supplementary Figure S5

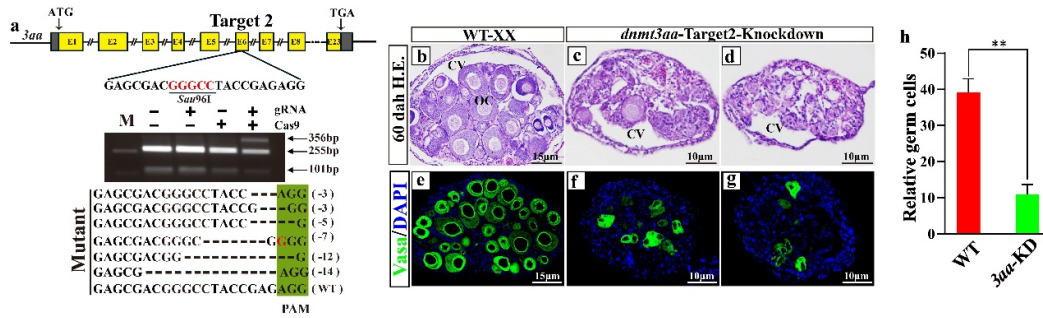

**Supplementary Figure S5.** Knockdown *dnmt3aa* by CRISPR/Cas9 in another target site. (a) Gene structures of *dnmt3aa* showing the second target site and the *Sau* 96I restriction site. The Cas9 mRNA and gRNA were added as indicated. Sanger sequencing results from the uncleaved bands were listed. The PAM was marked in light green. (b-d) Histological analysis ovaries of WT and *dnmt3aa* highly efficient knockdown females. (e-g) Analysis of Vasa (germ cells marker) expression in WT and *dnmt3aa* knockdown ovaries by IF. Green fluorescence represents the Vasa signals. Blue fluorescence represents the DAPI signals. (h) Statistical analysis the germ cells number of WT and *dnmt3aa* knockdown fish ( $n = 5$ ). Results were presented as mean  $\pm$  SD. \*\*  $p < 0.01$ .

### Supplementary Figure S6

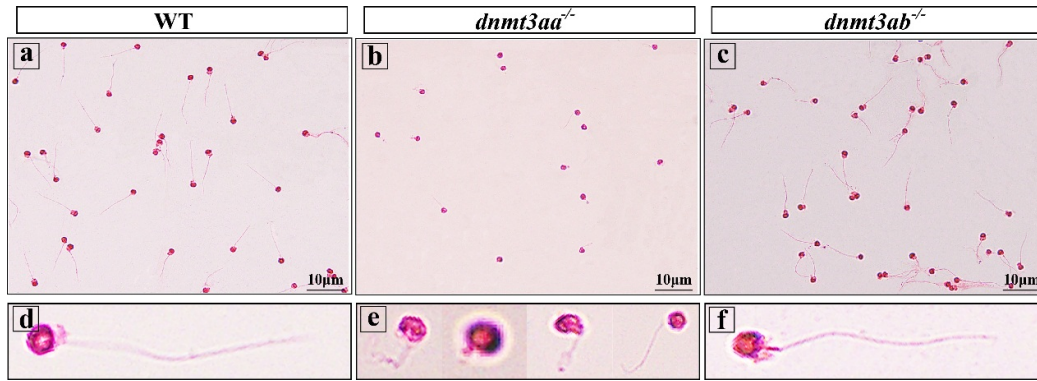

**Supplementary Figure S6.** Papanicolaou staining analysis of WT, *dnmt3aa*<sup>-/-</sup> and *dnmt3ab*<sup>-/-</sup> sperms. d, e, f are the amplification of a, b and c, respectively.

**Supplementary Figure S7**

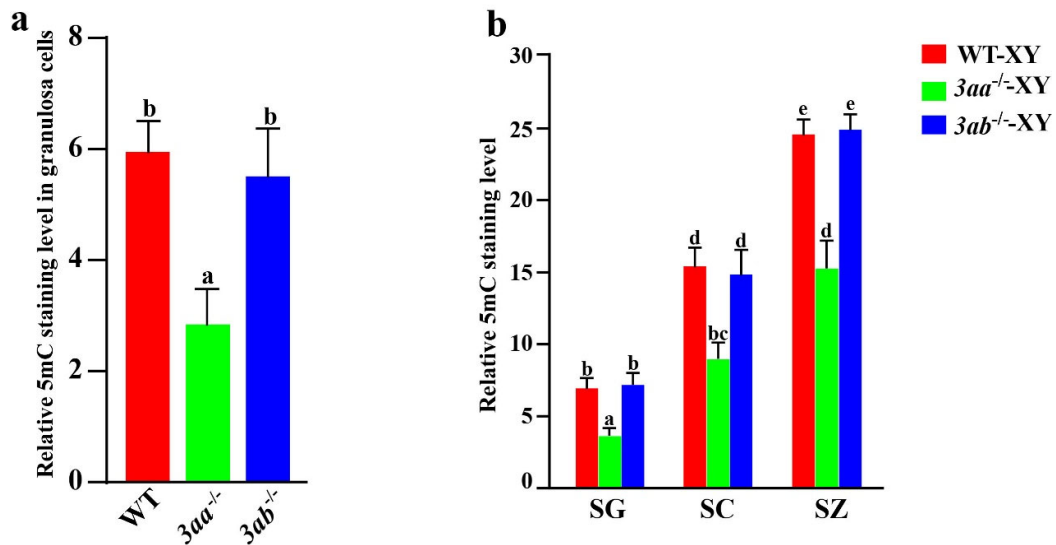

**Supplementary Figure S7.** (a) Statistical analysis relative 5-mC staining level of granulosa cells in WT, *dnmt3aa*<sup>-/-</sup> and *dnmt3ab*<sup>-/-</sup> ovaries at 120 dah. (b) Statistical analysis relative 5-mC staining level of WT, *dnmt3aa*<sup>-/-</sup> and *dnmt3ab*<sup>-/-</sup> spermatogonia, spermatocytes and spermatozoa in testes at 120 dah. Results were presented as mean ± SD. Different letters above the error bar indicate statistical differences at  $p < 0.05$  as determined by one-way ANOVA followed by Tukey's post-hoc test. SG, spermatogonia; SC, spermatocytes; SZ, spermatozoa. dah, day after hatching.

**Supplementary Table S1.** All primer sequences used in this study.

| Primer name                      | Sequence (5'-3')             | Purpose          |
|----------------------------------|------------------------------|------------------|
| gRNA- <i>dnmt3aa</i> -target 1-F | TAATACGACTCACTATAGGCAGACCA   | CRISPR/Cas9      |
|                                  | GGACAGTCCAGGTTTTAGAGCTAGAA   |                  |
| gRNA- <i>dnmt3aa</i> -target 2-F | TAATACGACTCACTATAGGAGCGA     |                  |
|                                  | CGGGCCTACCGAGGTTTTAGAGCTAGAA |                  |
| gRNA- <i>dnmt3ab</i> -target 1-F | TAATACGACTCACTATAGGAGAGAA    | CRISPR/Cas9      |
|                                  | CAATACTGGACTGTTTTAGAGCTAGAA  |                  |
| gRNA-R                           | AGCACCGACTCGGTGCCAC          |                  |
|                                  |                              |                  |
| <i>dnmt3aa</i> -KO-T1-detect-F   | CCTGAAGAGCTTCTTAGCCACA       | Mutant screening |
| <i>dnmt3aa</i> -KO-T1-detect-R   | ATGCATGTTTAACAAACCTCTGC      |                  |
| <i>dnmt3ab</i> -KO-detect-F      | TGTCTCATTGTCCACTCAACCA       |                  |
| <i>dnmt3ab</i> -KO-detect-R      | TGTTGAATCAGACCTAATCACTGC     |                  |
| <i>dnmt3aa</i> -KO-T2-detect-F   | AACCTGCCAGCATGTACTCG         | Mutant screening |
| <i>dnmt3aa</i> -KO-T2-detect-R   | TGTTGTTGTGAAGGGGGAGG         |                  |
| <i>dnmt3aa</i> -RT-PCR-F         | CAGTCCAGAGGAGGGG             |                  |
| <i>dnmt3aa</i> -RT-PCR-R         | TCTCCCCTGGCGACTGGCTCGG       |                  |
| <i>dnmt3ab</i> -RT-PCR-F         | TGGACTCGGACCTGAT             | RT-PCR           |
| <i>dnmt3ab</i> -RT-PCR-R         | CCTCCGCACGGCAAGAGGAAGG       |                  |
| <i>gapdh</i> -F                  | AAGCTCATTTCTGTGTAT           |                  |
| <i>gapdh</i> -R                  | CCTTTGCTGATTTCTTG            |                  |
| <i>dnmt3aa</i> -ISH-F            | CCCAGACACCAGAGAACGAC         | ISH              |
| <i>dnmt3aa</i> -ISH-R            | TGTTGTTGTGAAGGGGGAGG         |                  |
| <i>dnmt3ab</i> -ISH-F            | TCCACCAAAGCTTTACCCCC         |                  |
| <i>dnmt3ab</i> -ISH-R            | CCTGTTTCATGCCAGGAAGGT        |                  |
| <i>dnmt1</i> -qPCR-F             | TGGCTCCCACGTTGATGAC          | qRT-PCR          |
| <i>dnmt1</i> -qPCR-R             | AATTTGCCTTGCTCCTCCGT         |                  |
| <i>dnmt3aa</i> -qPCR-F           | TTGAGCCGGCCAAGTTGTAT         |                  |

|                          |                        |                |
|--------------------------|------------------------|----------------|
| <i>dnmt3aa</i> -qPCR-R   | CATGCCGACAGTGATGGAGT   |                |
| <i>dnmt3ab</i> -qPCR-F   | TCCACCAAAGCTTTACCCCC   |                |
| <i>dnmt3ab</i> -qPCR-R   | CGGACGATACCCACAGTGAT   |                |
| <i>dnmt3bb.1</i> -qPCR-F | AATGAGAACAGCCCCCTGAC   |                |
| <i>dnmt3bb.1</i> -qPCR-R | CGCTCCTGAAGACTTGTCGG   |                |
| <i>dnmt3ba</i> -qPCR-F   | CGAAAGAGGACGACAACCGT   |                |
| <i>dnmt3ba</i> -qPCR-R   | GTTCATGCCAGGCAGGTTTC   |                |
| <i>dnmt3bb.2</i> -qPCR-F | CTTTACCTGAACCGGGCACA   |                |
| <i>dnmt3bb.2</i> -qPCR-R | TATTCCCTGGAACGCACAGG   |                |
| <i>baxa</i> -qPCR-F      | TGCATCAGATTCACGATGAGTT |                |
| <i>baxa</i> -qPCR-R      | ACGAGTCGGCATGCAAAGTA   |                |
| <i>baxb</i> -qPCR-F      | TGGCAATAAAGCAGTGACGA   |                |
| <i>baxb</i> -qPCR-R      | CCTCTCTTGTTGGGACAAAGT  |                |
| <i>caspase3a</i> -qPCR-F | GGAAAACAATCAGCGGGCTC   |                |
| <i>caspase3a</i> -qPCR-R | CGTCAGTACCGTTTCGCTGA   |                |
| <i>caspase3b</i> -qPCR-F | ACTGTGGCTCAGATGAAAAAGC |                |
| <i>caspase3b</i> -qPCR-R | GACCCTTGCAAGTGGTTTCCT  |                |
| <i>caspase8</i> -qPCR-F  | CCGCAACAGCAGTTCACATT   |                |
| <i>caspase8</i> -qPCR-R  | TCAGGAAGAGGGGTGGGATT   |                |
| <i>caspase9</i> -qPCR-F  | TTCCTAGTAAGCTATCGCCTGA |                |
| <i>caspase9</i> -qPCR-R  | CTATGTTGGAGCCCTTGCGA   |                |
| AMH-F5                   | ATGGCTCCGAGACCTTGACTG  | Genetic sex    |
| AMH-R3                   | CAGAAATGTAGACGCCAGGTAT | identification |

---
